# Supplementary material for: Reliability ensemble averaging of 21st century projections of terrestrial net primary productivity reduces global and regional uncertainties
Source: Copernicus journal article supplement (doi:10.5194/esd-9-153-2018), 2018-02-21
Supplement: Supplementary file 1 [file esd-9-153-2018-supplement.pdf]

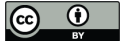

## *Supplement of*

# **Reliability ensemble averaging of 21st century projections of terrestrial net primary productivity reduces global and regional uncertainties**

**Jean-François Exbrayat et al.**

*Correspondence to:* Jean-François Exbrayat ([j.exbrayat@ed.ac.uk](mailto:j.exbrayat@ed.ac.uk))

The copyright of individual parts of the supplement might differ from the CC BY 4.0 License.

1

2

3

4

5 Fig S1:  $\Delta$ NPP for each model

6 Fig S2: mean annual NPP in each observational dataset

7 Fig S3: variability in each observational dataset

8 Fig S4-12: weights  $R_i$ ,  $R_{B,i}$  and  $R_{D,i}$  assigned to each model for each  $REA_C$ ,  $REA_F$  and  $REA_M$

9

10

11

12

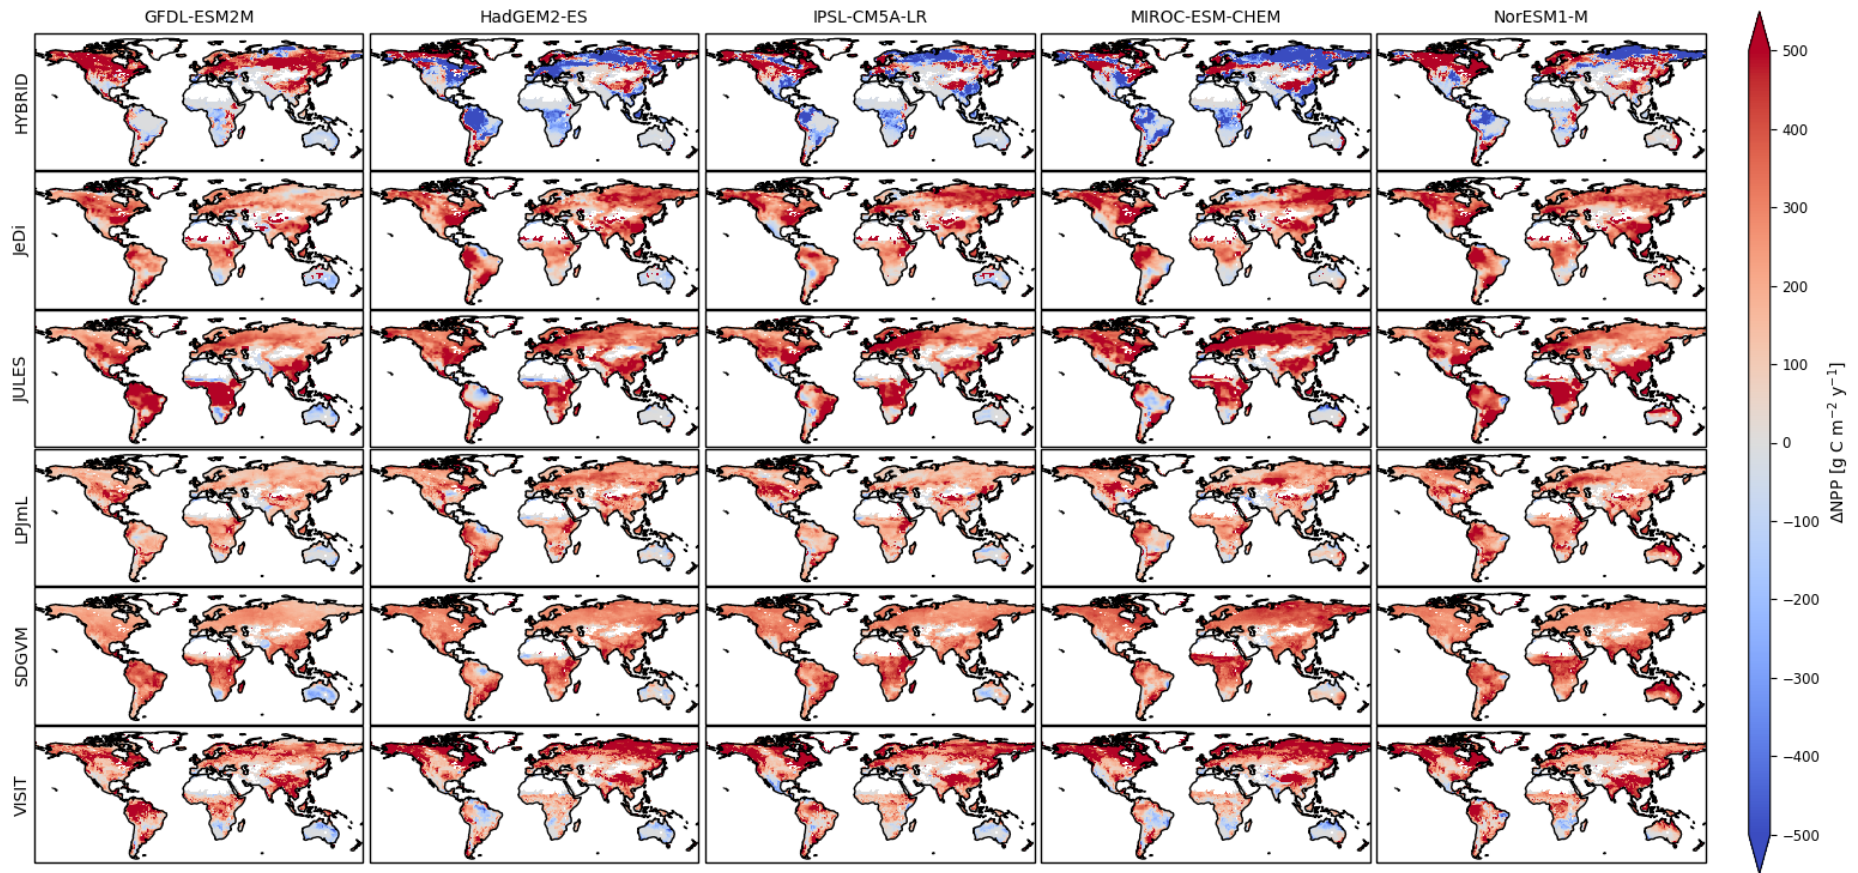

13

14 Figure S1. Mean annual change in NPP ( $\text{g C m}^{-2} \text{ y}^{-1}$ ) for each ensemble members.

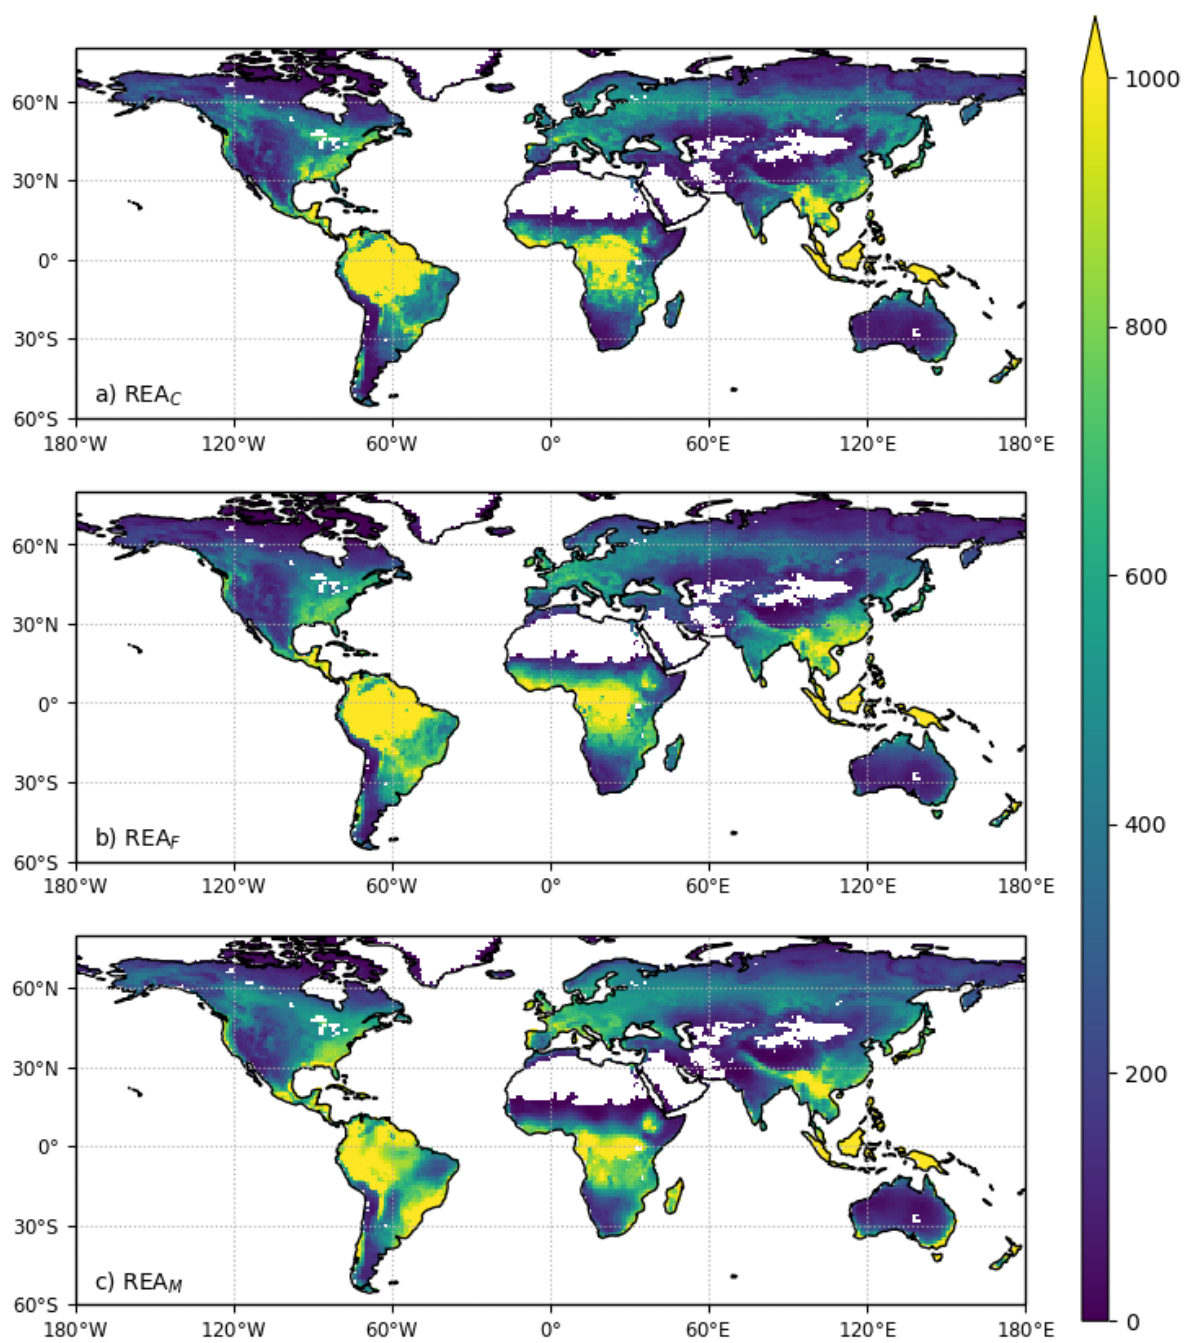

Figure S2. Mean annual NPP ( $\text{g C m}^{-2} \text{y}^{-1}$ ) used in (a)  $\text{REA}_C$ , (b)  $\text{REA}_F$  and (c)  $\text{REA}_M$ .

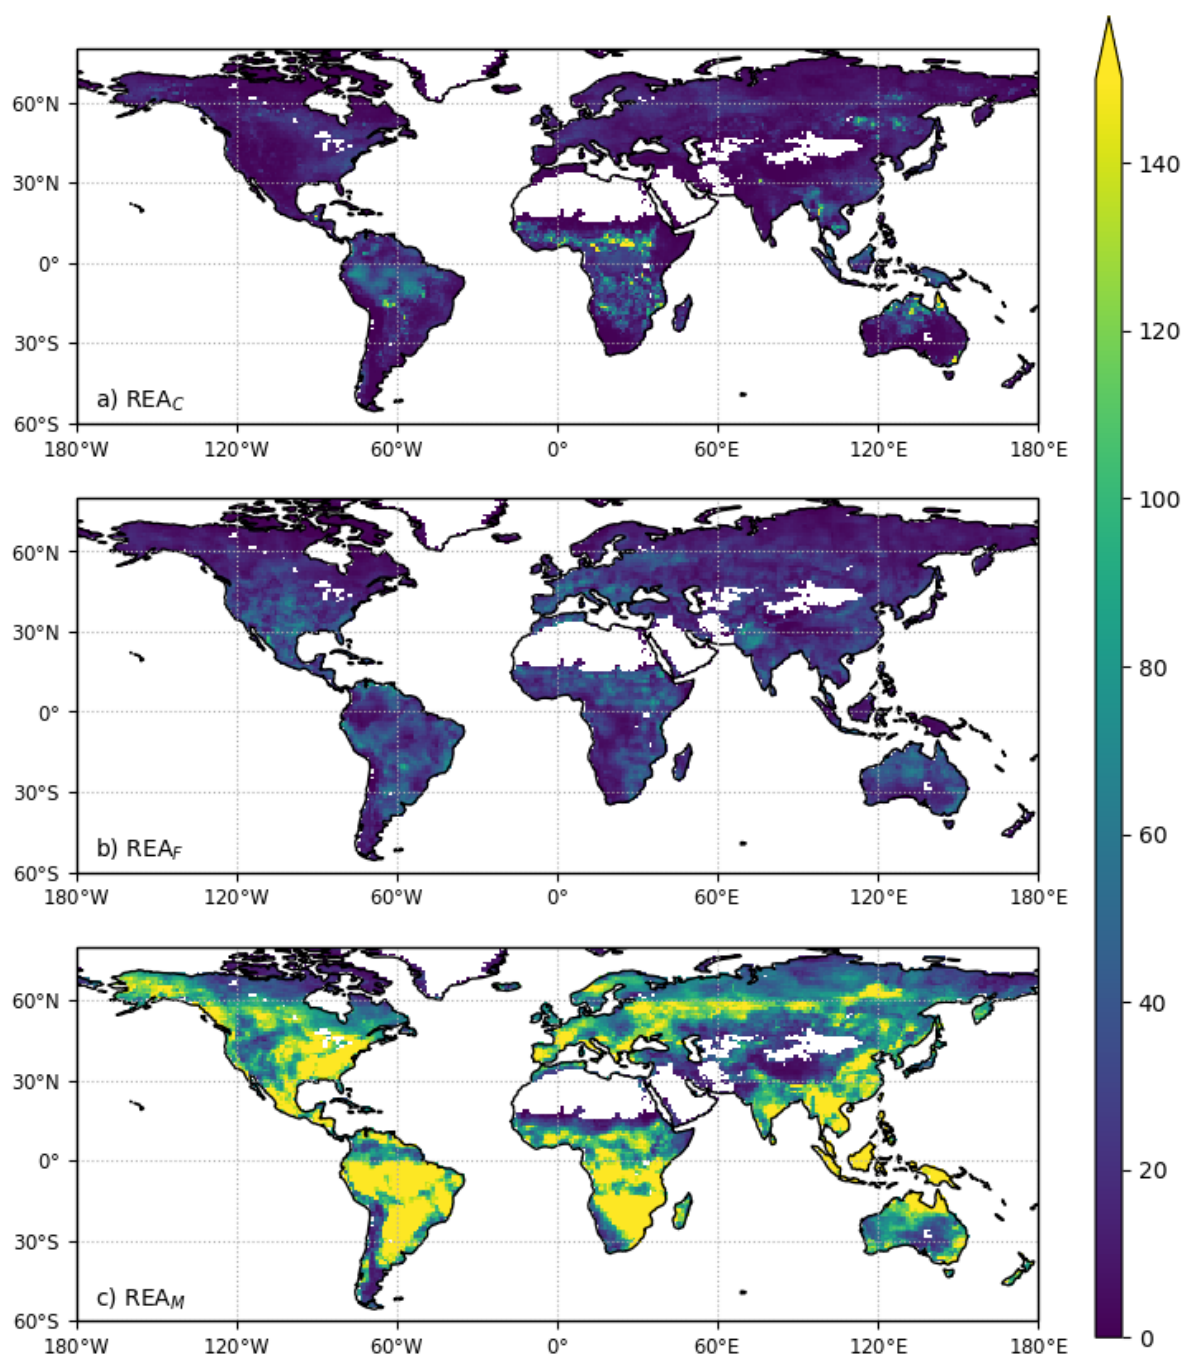

20

21

22 Figure S3. Variability of annual NPP ( $\text{g C m}^{-2} \text{y}^{-1}$ ) used as  $\varepsilon$  (equation 1) in (a)  $\text{REA}_C$ , (b)

23  $\text{REA}_F$  and (c)  $\text{REA}_M$ .

24



25

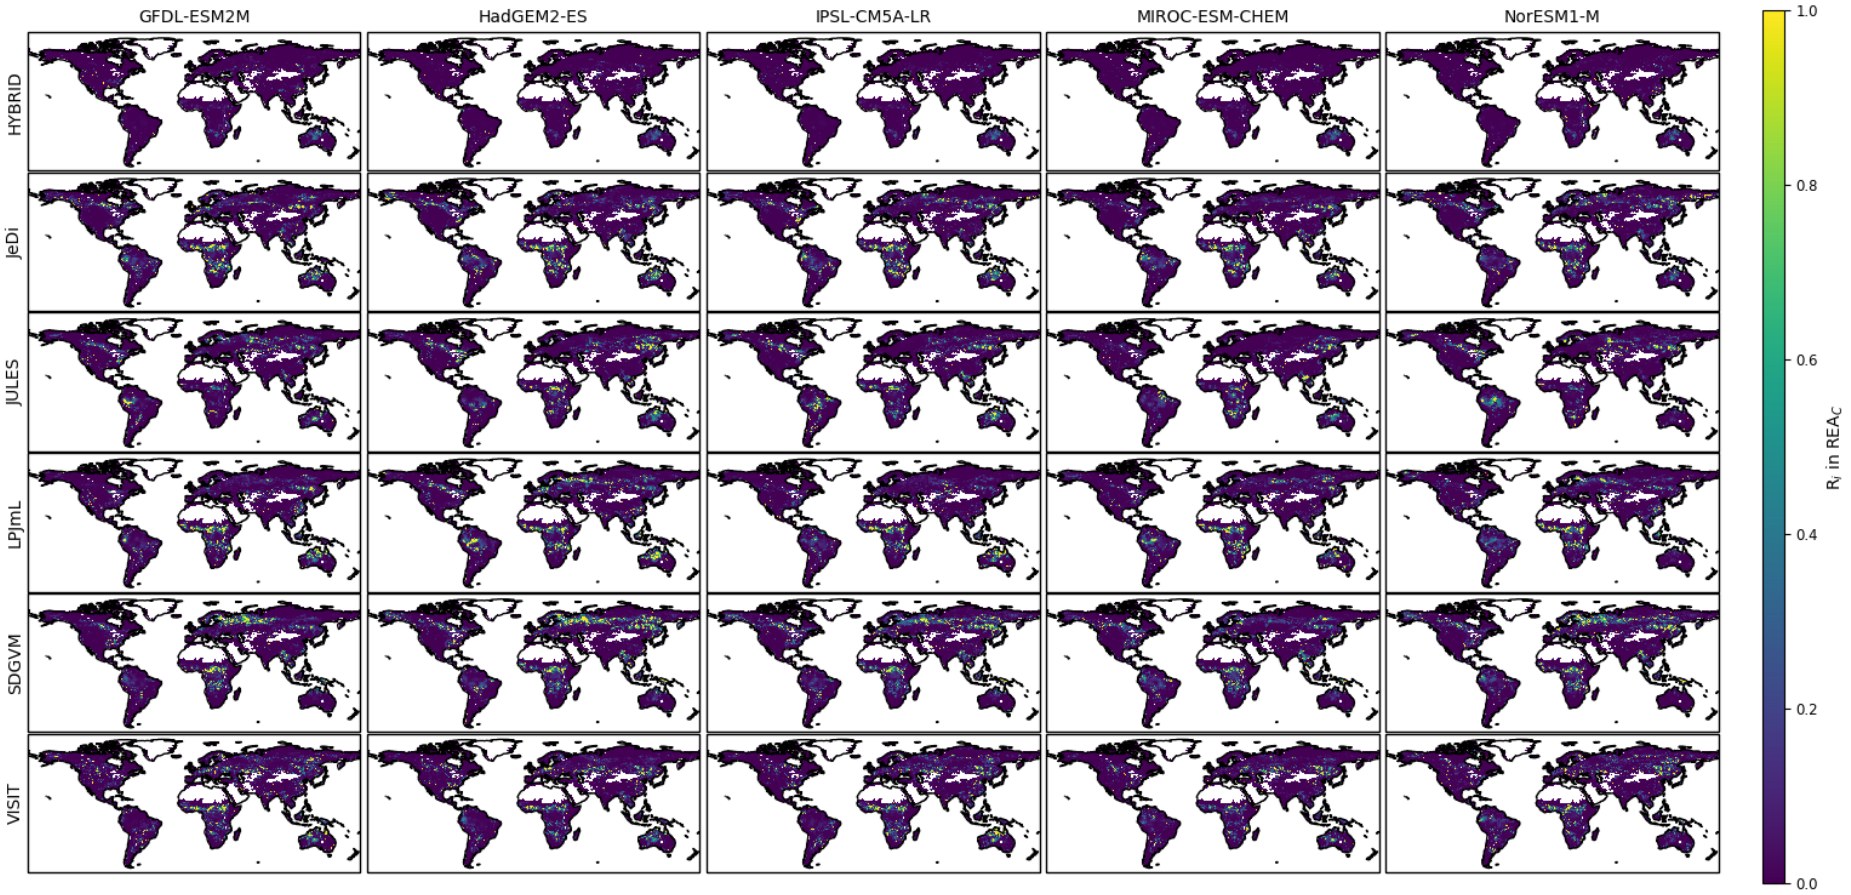

26

27 Figure S4. Models weights  $R_i$  assigned to each model in the REAc.

28

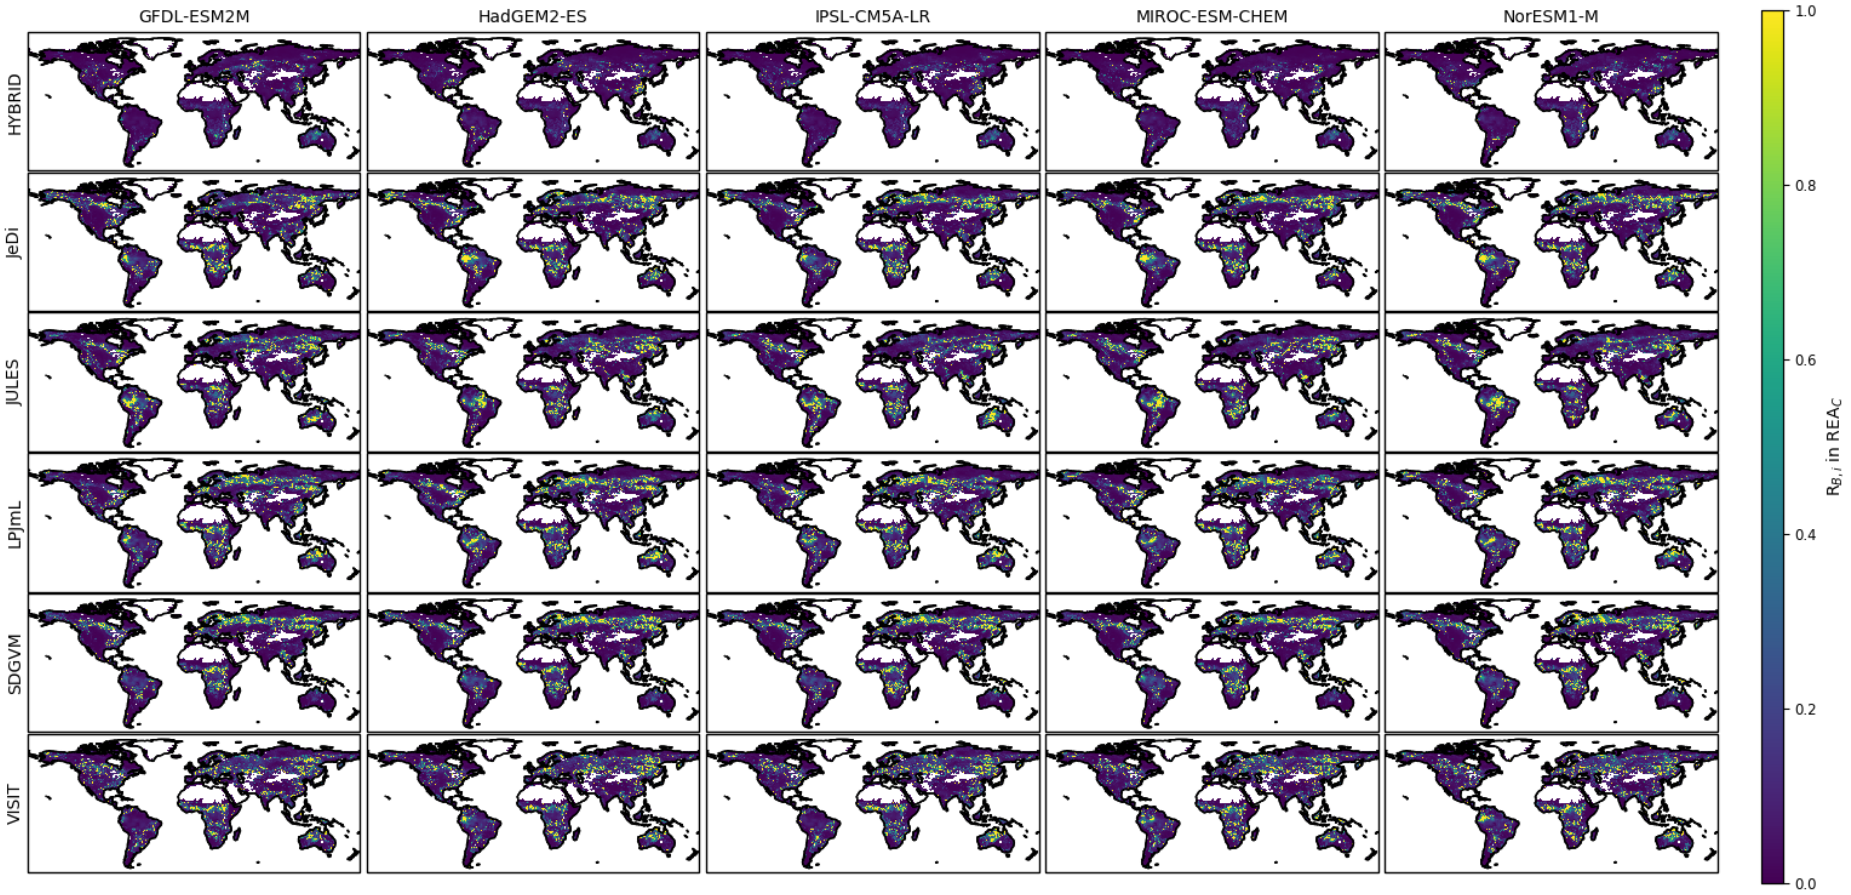

Figure S5. Performance based model weight  $R_{B,i}$  assigned to each model in REA<sub>C</sub>.



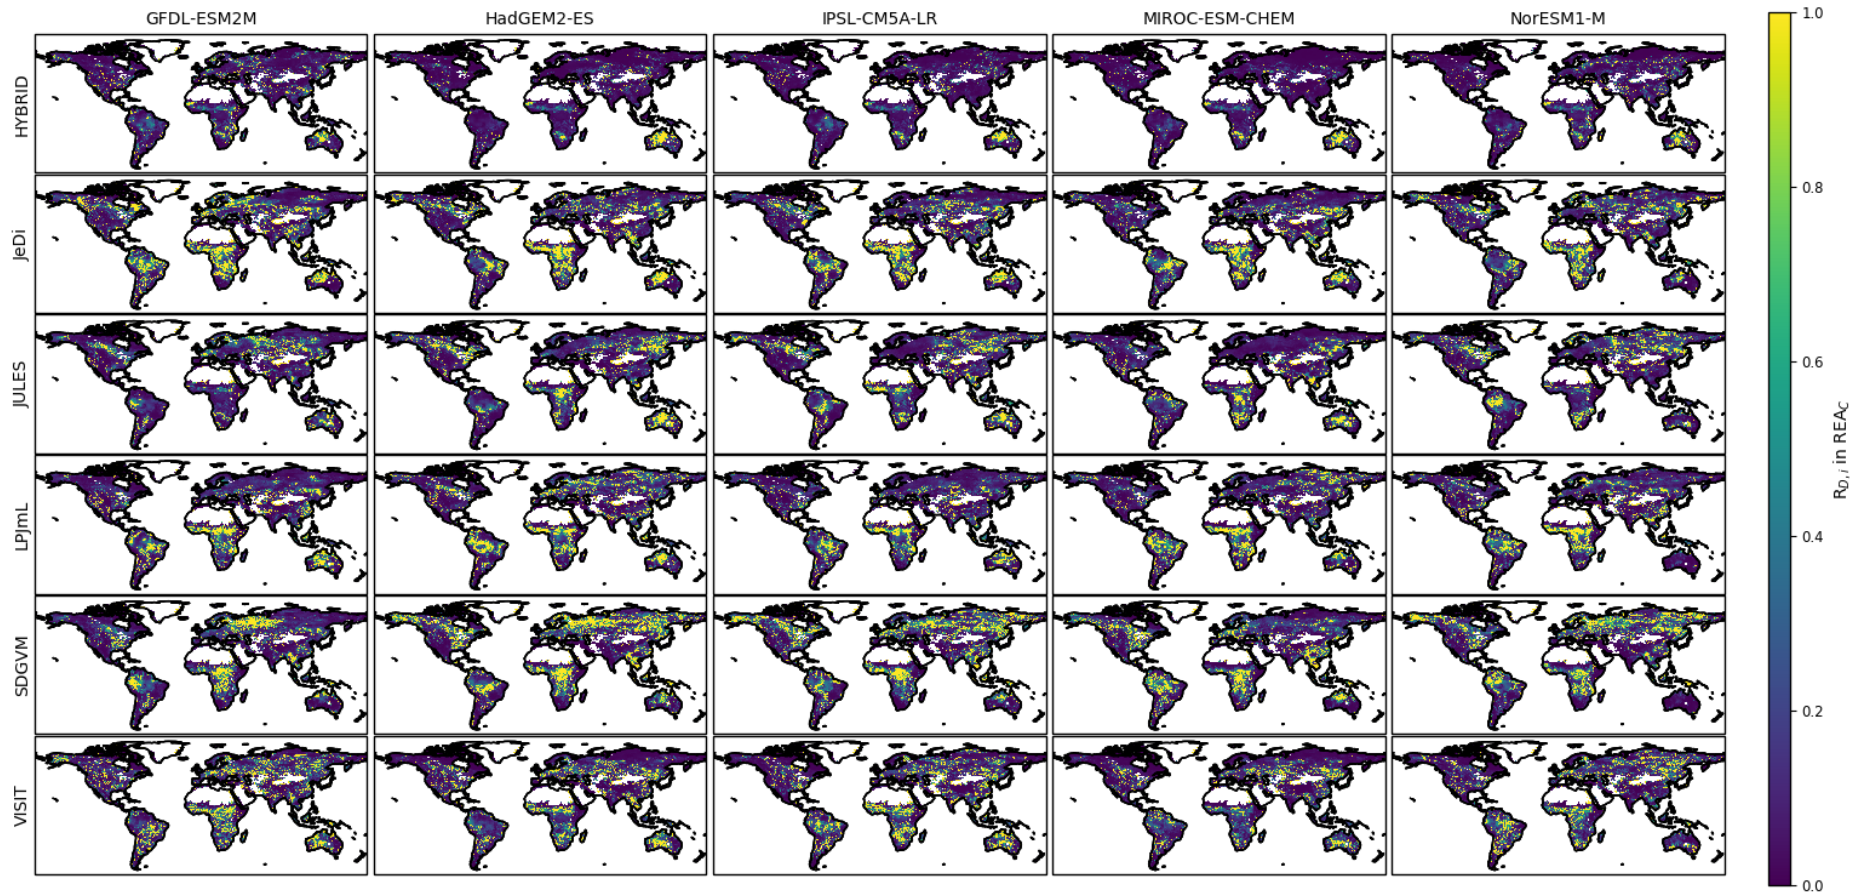

Figure S6. Convergence based weight  $R_{D,i}$  assigned to each model in  $REA_C$ .



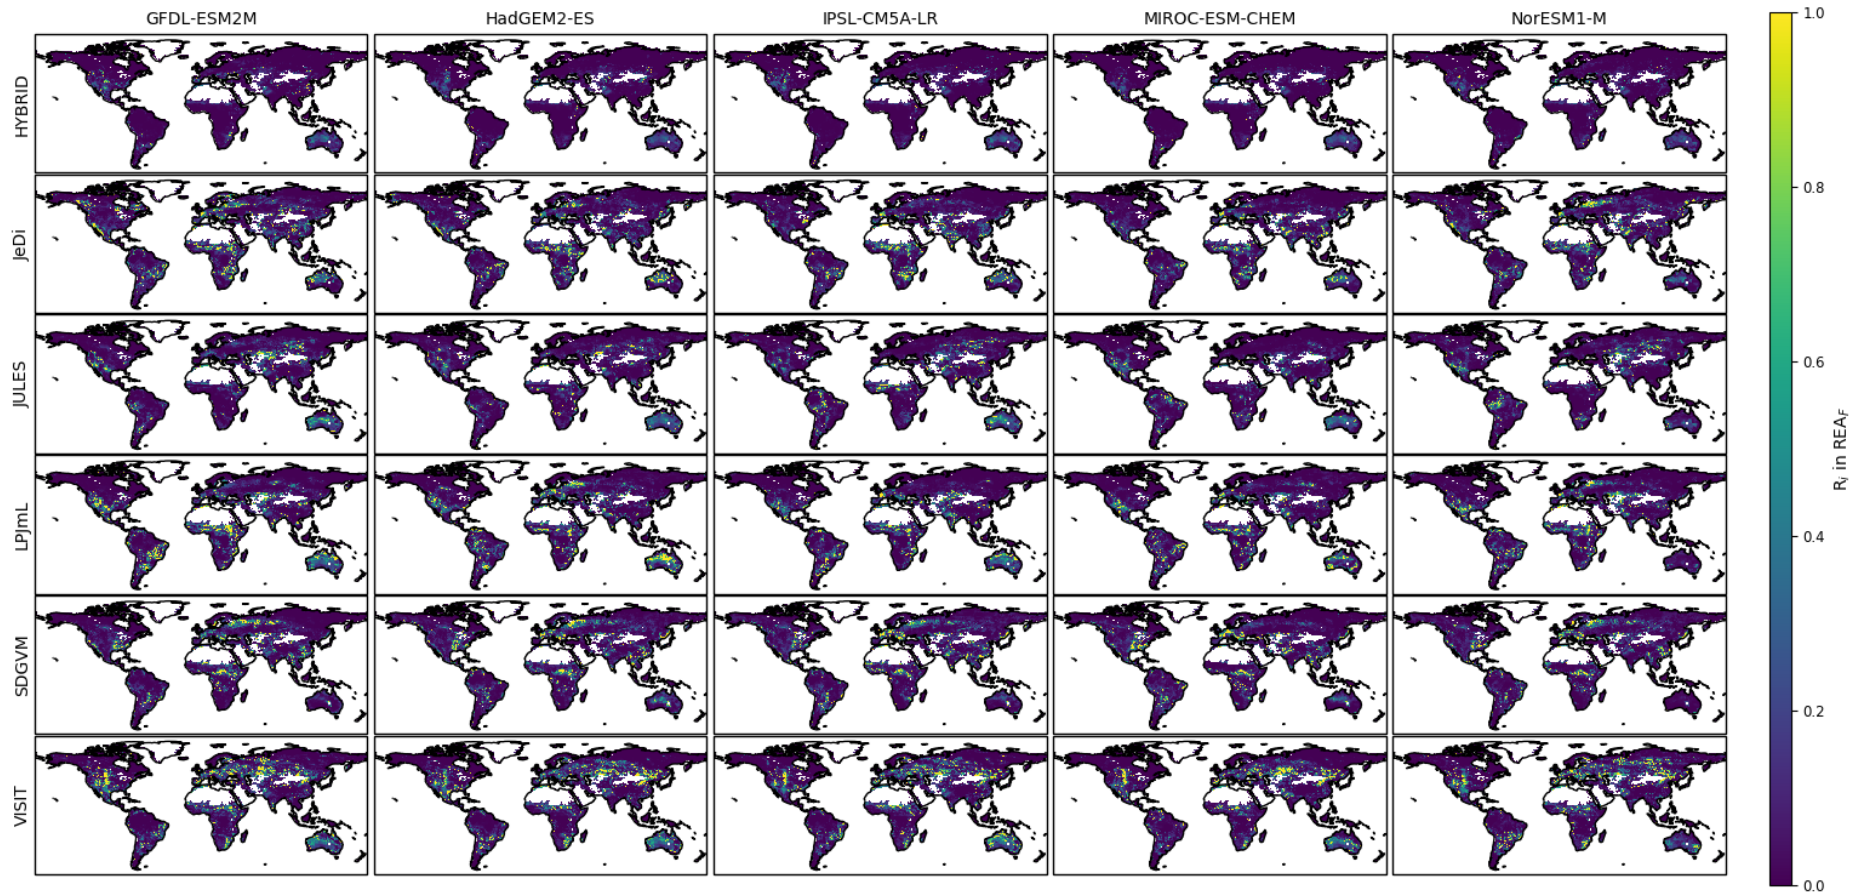

Figure S7. Models weights  $R_i$  assigned to each model in the REA<sub>F</sub>.

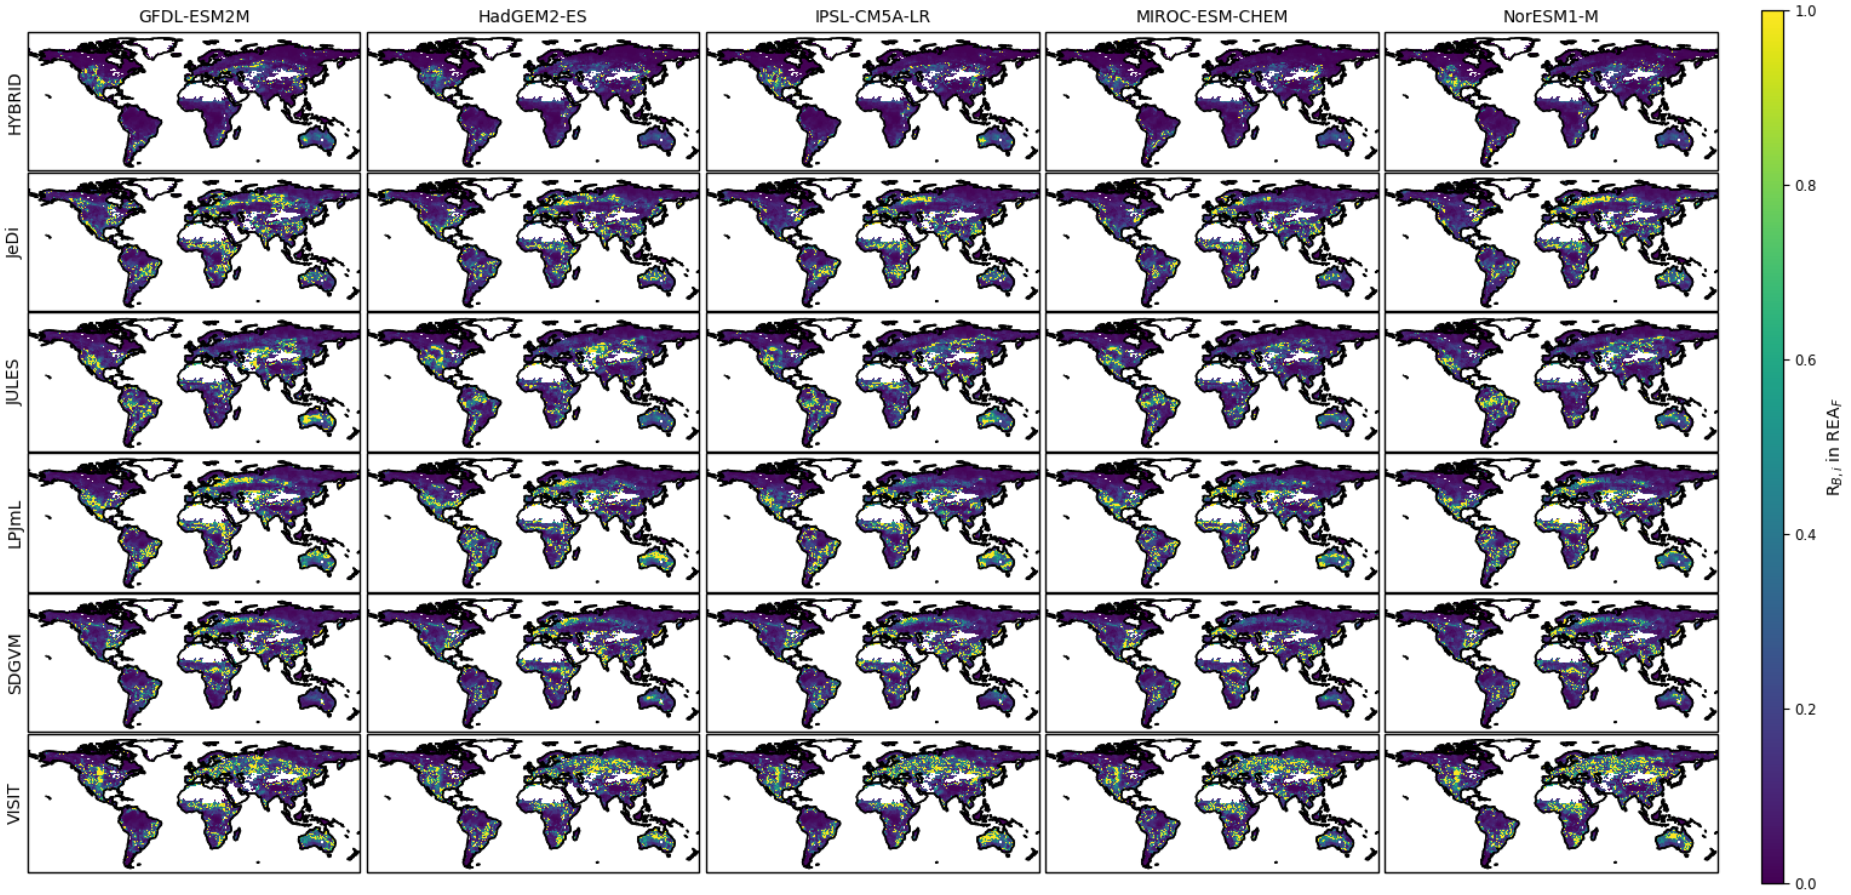

Figure S8. Performance based model weight  $R_{B,i}$  assigned to each model in  $REA_F$ .



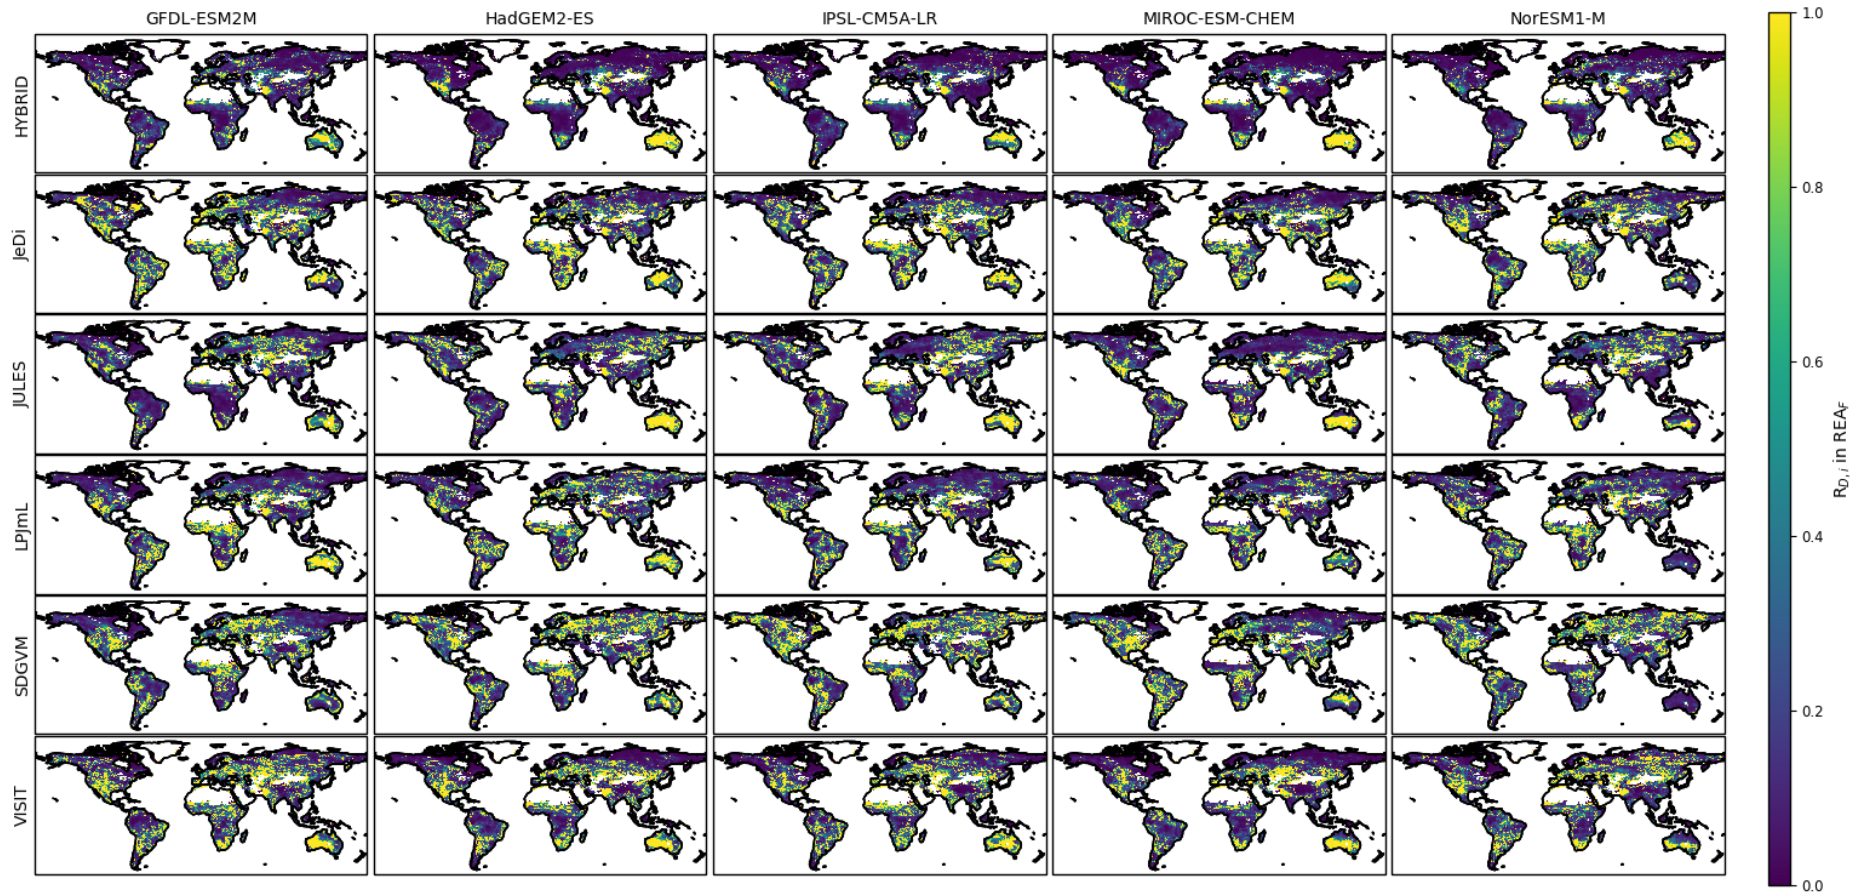

Figure S9. Convergence based weight  $R_{D,i}$  assigned to each model in  $REA_F$ .

46

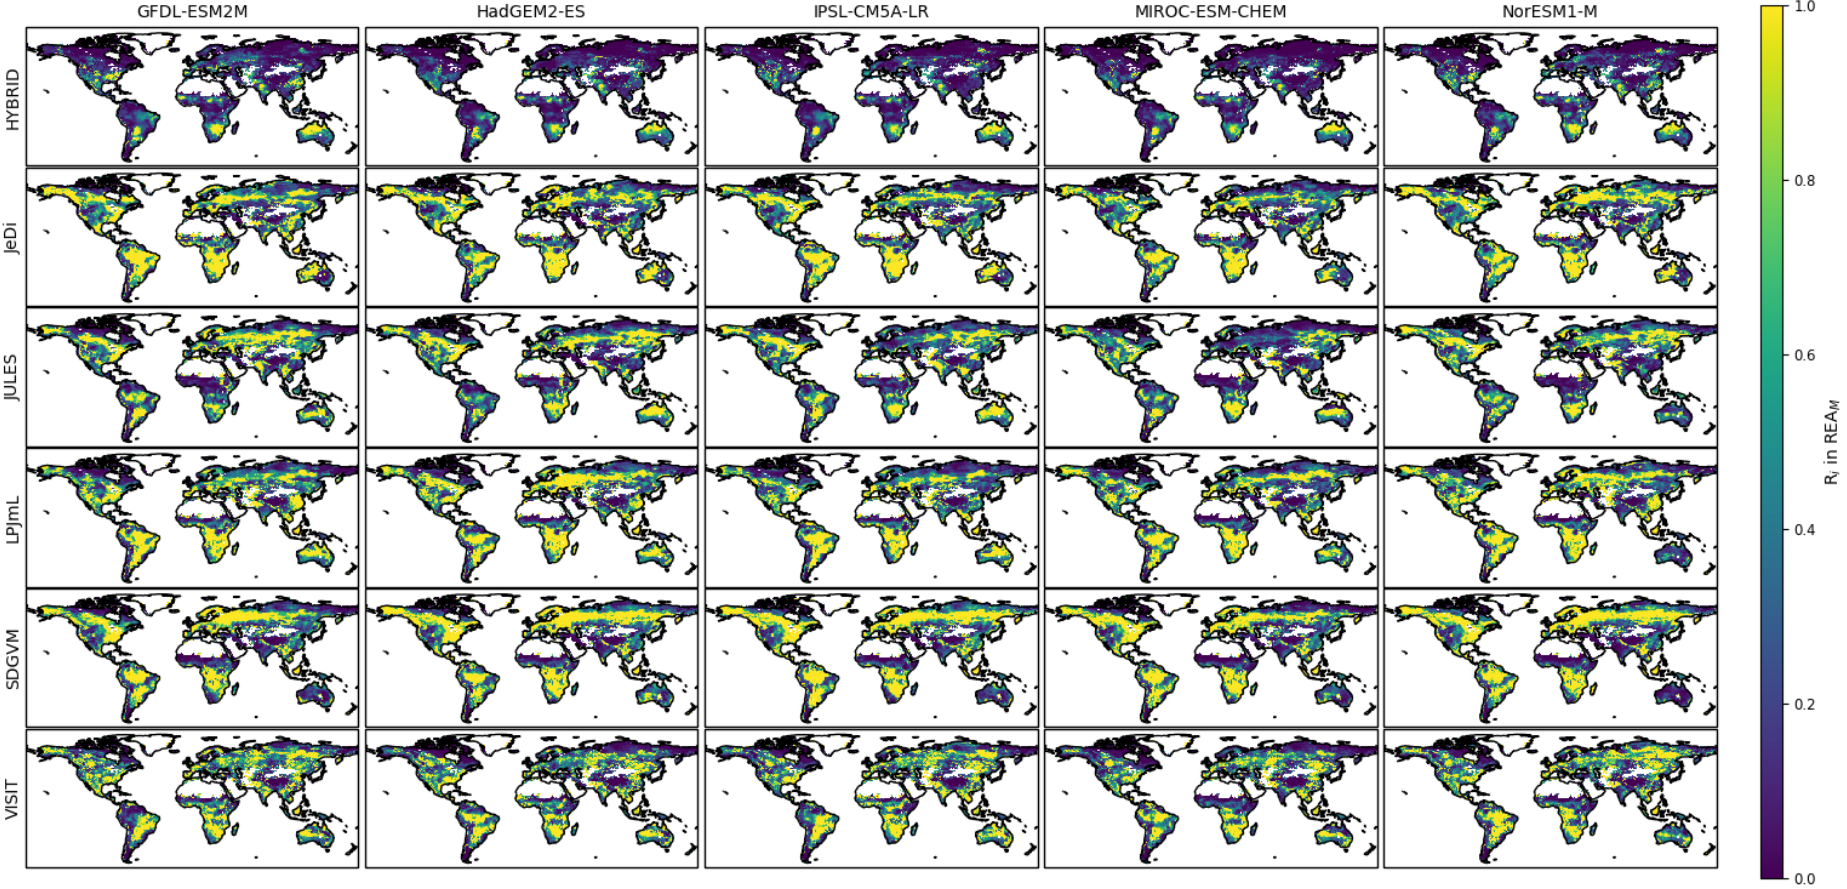

47

48 Figure S10. Models weights  $R_i$  assigned to each model in the REA<sub>M</sub>.

49



50

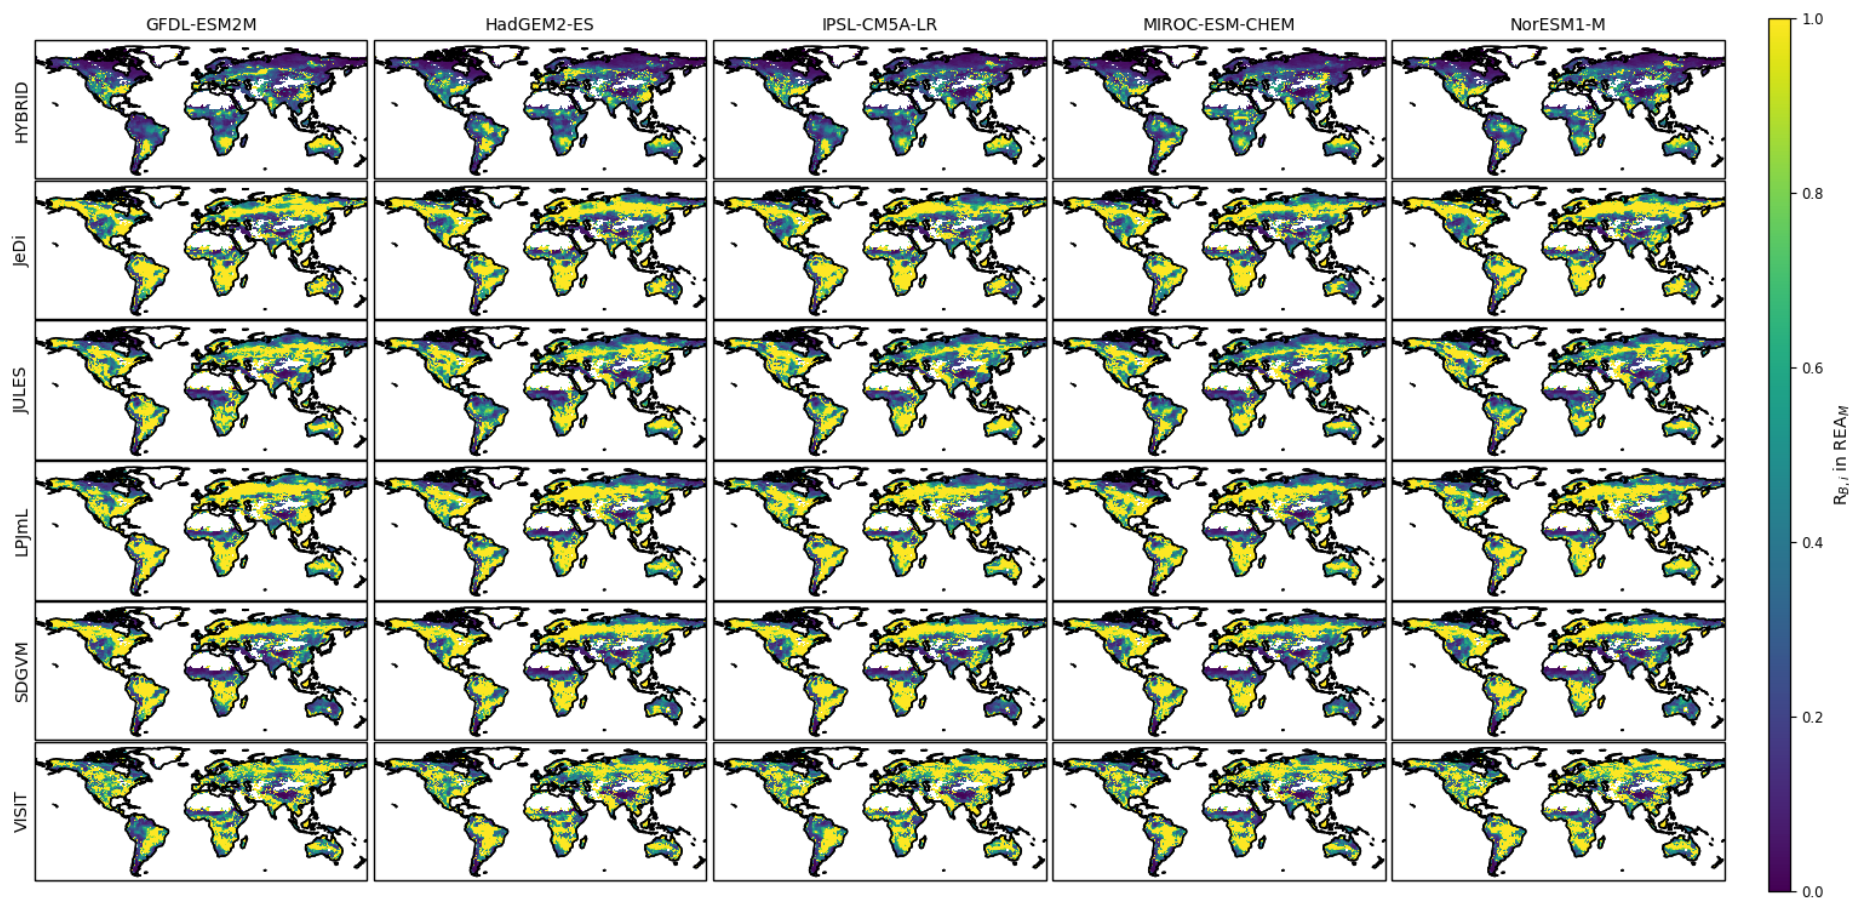

51

52 Figure S11. Performance based model weight  $R_{B,i}$  assigned to each model in  $REA_M$ .

53

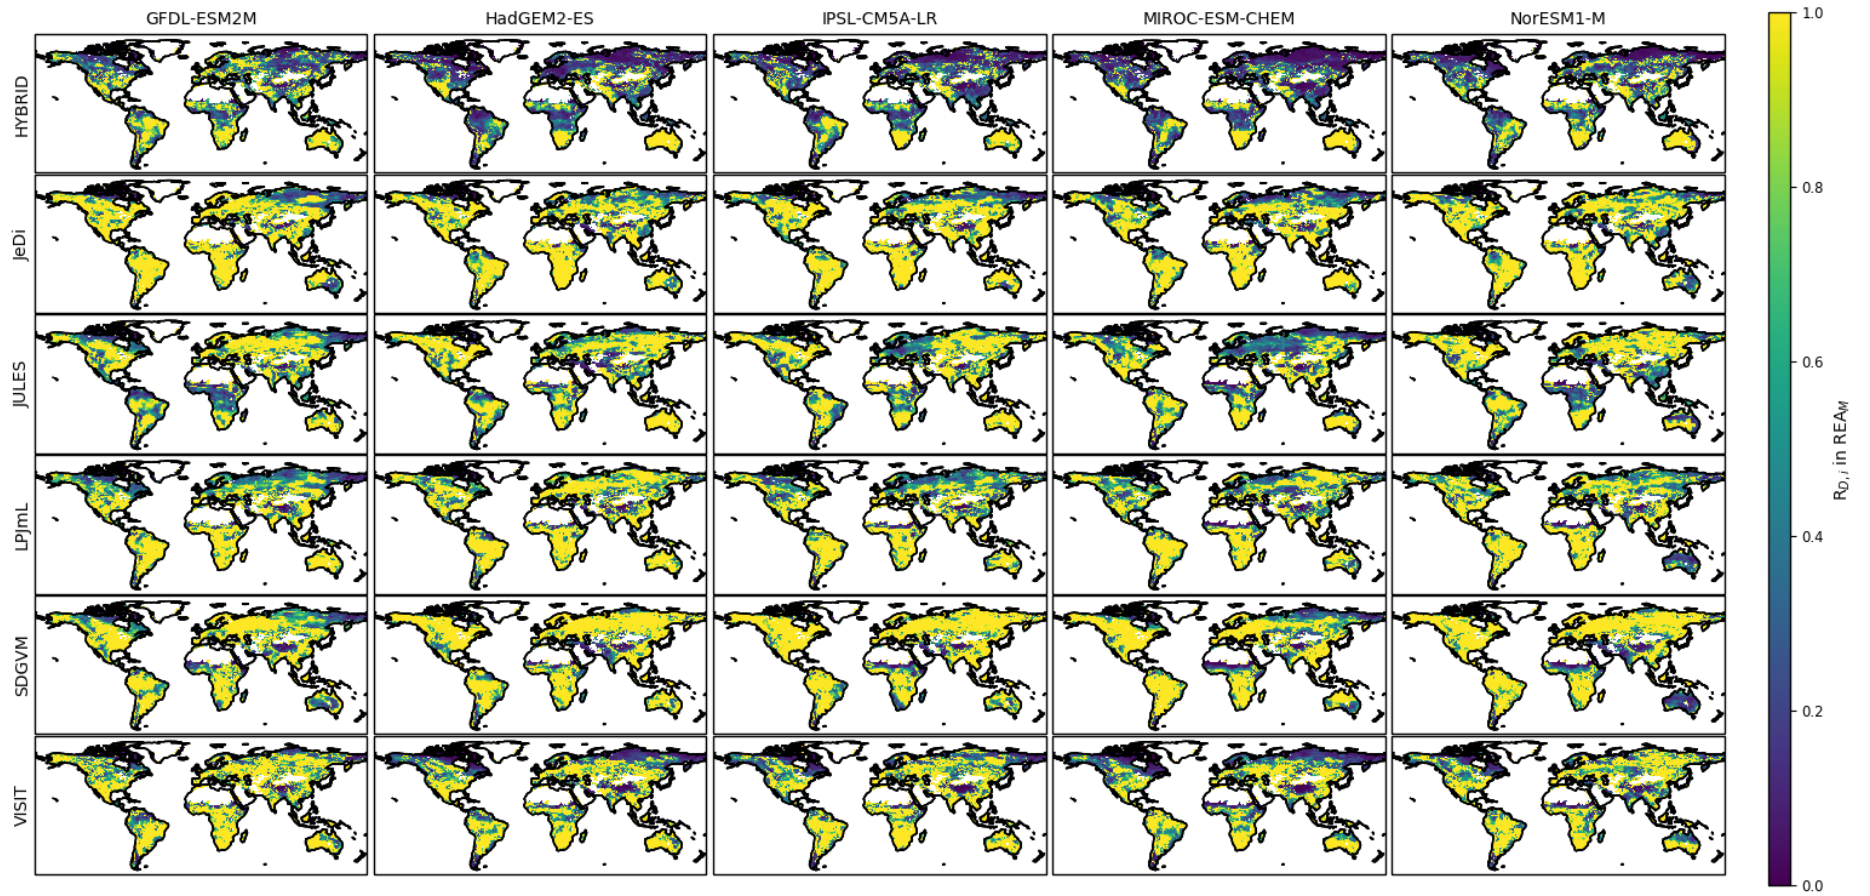

Figure S12. Convergence based weight  $R_{D,i}$  assigned to each model in  $REA_M$ .
